# Supplementary material
Source: Springer Nature journal article supplement (https://www.springermedizin.de/resource/supplementary/12913_2007_651_MOESM1_ESM.pdf/9535888)

**Number of clients**

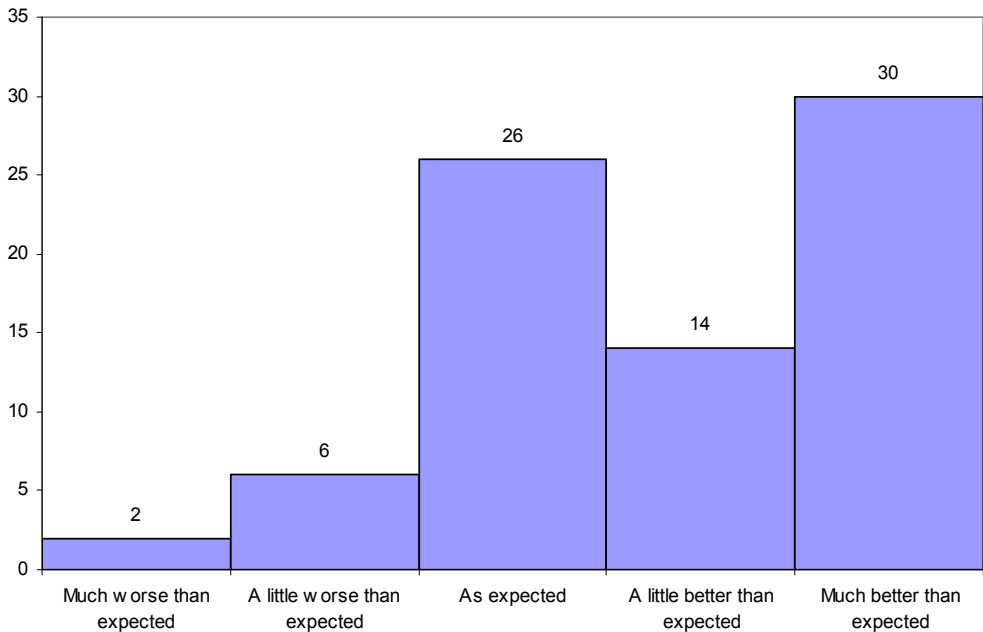

**Perceived quality**

Supplement: MOESM1 [file 9535888]
